# Supplementary material for: The Effect of High Lignin Content on Oxidative Nanofibrillation of Wood Cell Wall
Source: MDPI journal article supplement (doi:10.3390/nano11051179), 2021-04-29
Supplement: s1 [file s1]

*Supplementary material*

# The Effect of High Lignin Content on Oxidative Nanofibrillation of Wood Cell Wall

Simon Jonasson <sup>1</sup>, Anne Bänder <sup>2</sup>, Linn Berglund <sup>1</sup>, Magnus Hertzberg <sup>3</sup> Totte Niittylä <sup>2</sup> and Kristiina Oksman <sup>1,4,\*</sup>

1 Division of Materials Science Department of Engineering Sciences and Mathematics, Luleå University of Technology, SE 97187 Luleå, Sweden; simon.jonasson@ltu.se (S.J.); linn.berglund@ltu.se (L.B.); kristiina.oksman@ltu.se (K.O.)

2 Umeå Plant Science Centre, Department of Forest Genetics and Plant Physiology, Swedish University of Agricultural Sciences, SE 90187 Umeå, Sweden; anne.bunder@slu.se (A.B.); totte.niittyla@slu.se (T.N.)

3 SweTree Technologies AB, SE 90403 Umeå, Sweden; magnus.hertzberg@swetree.com

4 Department of Mechanical & Industrial Engineering, University of Toronto, Toronto, ON M5S 3G8, Canada; kristiina.oksman@ltu.se

\* Correspondence: kristiina.oksman@ltu.se, telephone +46 920 497731

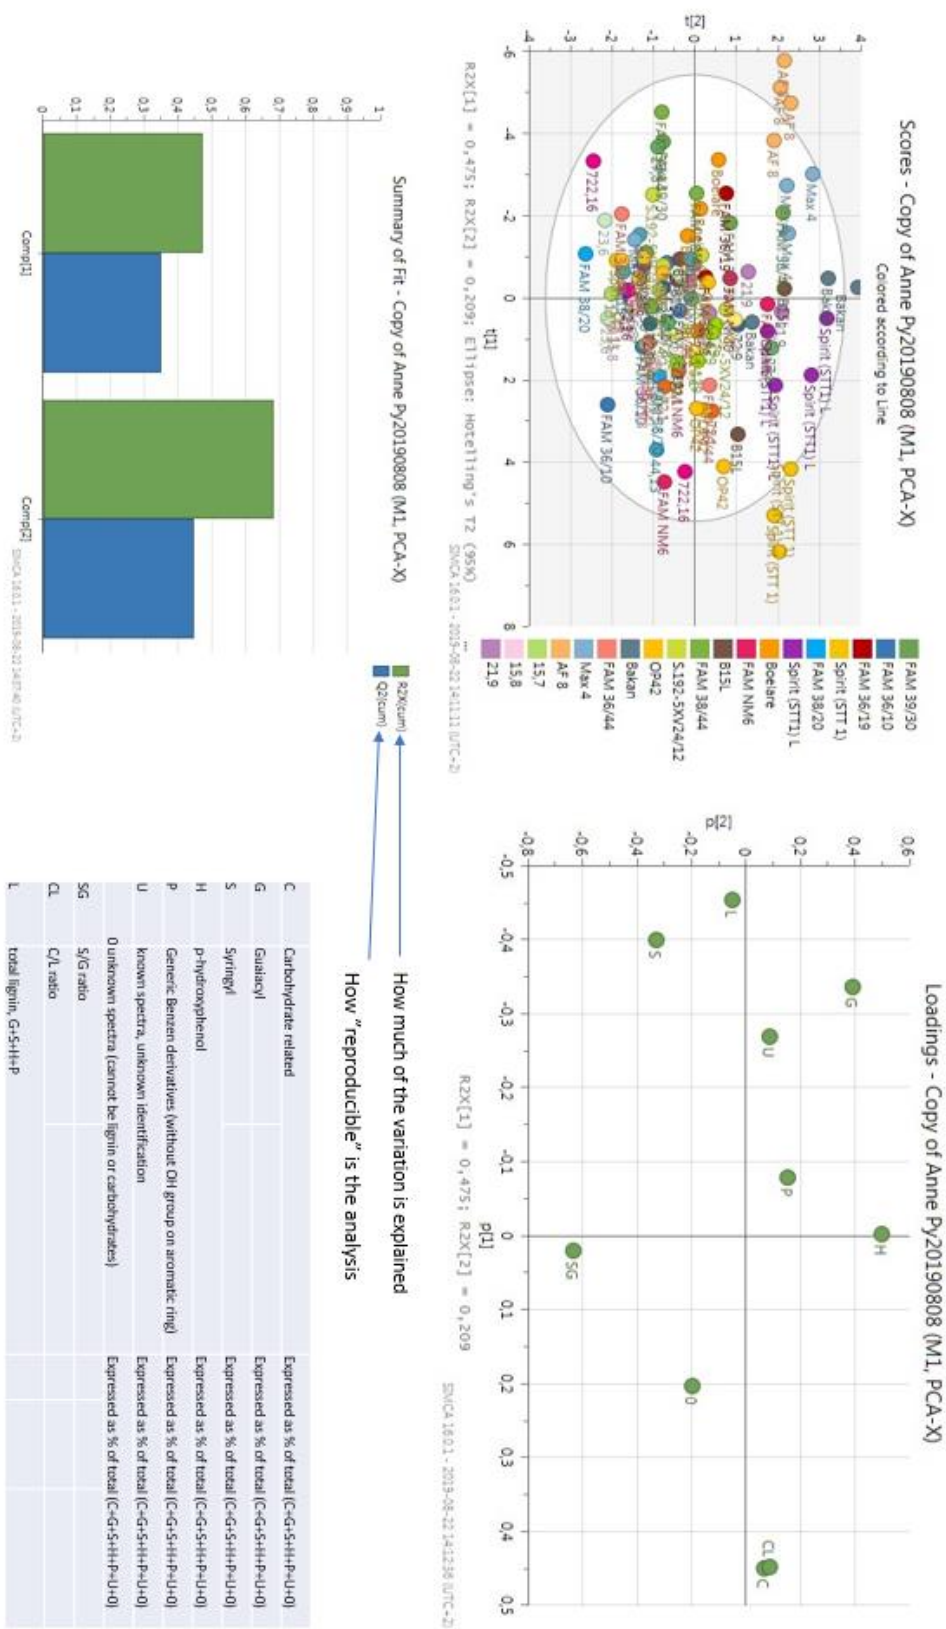

Figure S1. PCA of trees available in the library.

**Table S1.** Composition of the trees as obtained from pyrolysis.

| Families with clones                      |          | Carbohy-<br>drate re-<br>lated | G-lignin   | S-lignin   | H-lignin    | Total Lignin |
|-------------------------------------------|----------|--------------------------------|------------|------------|-------------|--------------|
| <b>Spirit (STT 1)</b>                     | 43.2     | 79.39413058                    | 5.13556123 | 11.3382633 | 0.479532715 | 17.35833032  |
| Spirit (STT 1)                            | 35.10    | 77.90872278                    | 5.67030876 | 12.1201371 | 0.478696423 | 18.73974673  |
| Spirit (STT 1)                            | 39.8     | 77.09619465                    | 6.20669186 | 12.7300603 | 0.479924724 | 19.90349769  |
| Spirit (STT 1)                            | 17.11    | 70.00975745                    | 5.99208837 | 19.893098  | 0.260621655 | 26.71023274  |
| Spirit (STT1) L                           | Lugnet 1 | 73.86934094                    | 6.96649858 | 14.2871844 | 0.782496169 | 22.65626909  |
| Spirit (STT1) L                           | Lugnet 2 | 74.14434161                    | 6.65169331 | 14.6109207 | 0.583140054 | 22.47788245  |
| Spirit (STT1) L                           | Lugnet 3 | 73.07077676                    | 7.06540946 | 15.5894921 | 0.469330069 | 23.76180161  |
| Spirit (STT1) L                           | Lugnet 4 | 72.38398534                    | 7.40979841 | 15.3957273 | 0.889546923 | 24.41310677  |
| Bakan                                     | 34.6     | 72.7408638                     | 6.83737508 | 16.0513809 | 0.482324673 | 23.96943221  |
| Bakan                                     | 43.9     | 72.44773372                    | 7.16687213 | 15.6758708 | 1.159890524 | 24.62900438  |
| Bakan                                     | 24.7     | 70.2446694                     | 6.11923182 | 19.4662896 | 0.341748524 | 26.52696704  |
| Bakan                                     | 7.7      | 71.05757304                    | 7.05783914 | 16.8110824 | 1.183449518 | 25.83318707  |
| 15.8                                      | 30.9     | 73.71833999                    | 5.50287681 | 16.5716549 | 0.247367014 | 22.7833253   |
| 15.8                                      | 23.7     | 72.25923324                    | 5.37282356 | 18.3342522 | 0.23716256  | 24.45261294  |
| 15.8                                      | 38.6     | 71.76451634                    | 5.70574466 | 18.5744868 | 0.245609113 | 25.10671757  |
| 15.8                                      | 17.12    | 73.25168045                    | 5.54513301 | 17.0314725 | 0.272375223 | 23.48355789  |
| AF 8                                      | 41.11    | 66.94417967                    | 9.827678   | 19.1778049 | 0.343543556 | 30.02292106  |
| AF 8                                      | 12.9     | 65.16073262                    | 10.6184291 | 19.9303762 | 0.50563808  | 31.69005912  |
| AF 8                                      | 9.4      | 64.89249936                    | 10.0785239 | 20.8465248 | 0.559053223 | 32.20274843  |
| AF 8                                      | 35.8     | 64.40048316                    | 10.8973174 | 20.6978491 | 0.389656211 | 32.63229518  |
| OP42                                      | 35.12    | 74.72830901                    | 6.14658049 | 15.0107642 | 0.245130657 | 21.82841363  |
| OP42                                      | 44.10    | 76.68249215                    | 5.81155258 | 13.6540381 | 0.227076194 | 20.13494716  |
| OP42                                      | 25.3     | 74.99913141                    | 5.93310421 | 15.1370032 | 0.177027698 | 21.77146552  |
| OP42                                      | 12.8     | 71.39227056                    | 7.06777032 | 17.594932  | 0.253974536 | 25.51543051  |
| <b>Families with individual Genotypes</b> |          |                                |            |            |             |              |
| FAM NM6                                   | 31.11    | 77.16978376                    | 4.71932233 | 14.323105  | 0.203728997 | 19.69059518  |
| FAM NM6                                   | 46.9     | 72.512597                      | 7.26972281 | 16.1644725 | 0.504119573 | 24.40969567  |
| FAM 36/10                                 | 49.2     | 74.38439352                    | 4.83883573 | 16.7587762 | 0.184183465 | 22.26252018  |

**Table S2.** Library ID of trees studied in the manuscript.

| Manuscript ID | Library ID              |
|---------------|-------------------------|
| 1             | Spirit (STT 1) 43.2     |
| 2             | FAM NM6 31.11           |
| 3             | Spirit (STT1)L Lugnet 4 |
| 4             | 15.8 23.7               |
| 5             | Bakan 43.9              |
| 6             | AF 8 41.11              |
